# Supplementary material for: Elevated butyric acid and histamine in feces and serum as an indicator of onset of necrotic enteritis in broiler chickens
Source: Front Microbiol. 2025 May 9;16:1581309. doi: 10.3389/fmicb.2025.1581309 (PMC12098369; doi:10.3389/fmicb.2025.1581309)
Supplement: Supplementary file 5 [file Table_4.xlsx]

## Sheet: Table S4A
Table S4A: The distribution of significant metabolites across jejunum, rectum and serum samples of NE birds.
41 common metabolites in "S" and "J":				14 common metabolites in "R" and "J":			19 common metabolites in "R", "S" and "J":			78 common metabolites in "R" and "S":				71 metabolites included exclusively in "R":					172 metabolites included exclusively in "S":				51 metabolites included exclusively in "J":
Malonic acid				N-Acetyl-Isoleucine			Histamine			SM(OH) C22:2				LysoPC a C18:0					TG(18:1_38:6)				Shikimic acid
TG(20:5_36:3)				Cadaverine			p-Cresol sulfate			Caproic acid				LysoPC a C16:0					alpha-Ketoglutaric acid				Agmatine
TG(18:0_38:6)				C16OH			Valeric acid + Isovaleric acid			LysoPC a C18:2				TG(20:1_34:2)					TG(22:6_34:1)				Methylmalonic acid
PC ae C42:2				N-Acetyl-Leucine			2-Hydroxy-3-methylvaleric acid			LysoPC a C18:1				Adenosine					TG(22:5_34:1)				TG(18:2_30:0)
TG(18:3_34:2)				Deoxycytidine			N-Acetyl-Glutamic acid			Citrulline				Glyceric acid					TG(16:0_34:1)				TG(22:5_32:1)
CE(18:1)				C16:1OH			alpha-Aminobutyric acid			C4OH				LysoPC a C20:4					TG(18:1_32:0)				N-Acetyl-Proline
TG(20:4_34:2)				Propionic acid			Butyric acid + Isobutyric acid			LysoPC a C17:0				PC ae C38:2					TG(18:1_38:5)				Caffeic acid
TG(18:1_36:0)				TG(17:0_36:4)			Spermine			Cer(d18:1/24:1)				LysoPC a C14:0					2-Hydroxyisobutyric acid				Dimethylglycine
1,3-Diaminopropane				C12:1			C16:2OH			TG(20:5_34:2)				PC aa C32:3					TG(18:2_36:5)				N-Acetyl-Tyrosine
N-Acetylputrescine				Orotic acid			Citric acid			Phenylacetic acid				N-Acetyl-Valine					PC aa C36:0				HexCer(d18:2/22:0)
Allantoin				TG(16:1_32:2)			N-Acetyl-Glycine			TG(18:1_32:2)				C14:1OH					TG(20:4_36:3)				TG(18:2_35:3)
Cer(d18:0/24:0)				TG(16:0_32:3)			Creatine			SM(OH) C16:1				SM C24:1					PC aa C32:2				Quinolinic acid
PC ae C42:0				TG(18:1_32:3)			cis-Aconitic acid			CE(20:4)				Valine					C5:1				Cer(d16:1/24:0)
Hex2Cer(d18:1/20:0)				Quinoline-4-carboxylic acid			LysoPC a C26:1			LysoPC a C16:1				PC aa C32:0					PC aa C34:1				N1-Acetylspermidine
TG(20:3_32:1)							C16			C6				TG(20:3_34:1)					TG(18:0_32:1)				Cer(d18:1/18:0)
HexCer(d18:1/26:0)							HexCer(d18:1/26:1)			Trimethylamine N-Oxide				Xanthine					C18:1				Phenylethylamine
DG(14:0_18:1)							N1-Acetyl-Lysine			SM(OH) C22:1				TG(17:0_34:3)					TG(18:2_38:4)				Oxalic acid
PC ae C42:1							N-Acetyl-Histidine			TG(18:1_35:3)				TG(20:1_32:2)					TG(16:0_34:2)				Spermidine
TG(16:1_36:5)							2-Hydroxybutyric acid			SM C16:0				PC ae C32:1					TG(18:1_36:5)				7-Methylguanine
C0										PC aa C32:1				PC ae C34:1					TG(18:3_36:3)				Indolelactic acid
C4:1										Hex3Cer(d18:1/24:1)				Hex3Cer(d18:1/16:0)					TG(18:1_32:1)				2-oxoadipic acid
C9										TG(16:0_40:6)				PC ae C34:2					Ethylmalonic acid				TG(16:1_33:1)
C12DC										5-Oxoproline				TG(18:1_30:2)					TG(18:2_38:5)				TG(16:0_28:1)
Choline										C5DC				Glutamic acid					PC aa C36:5				TG(16:1_32:0)
C8										C6:1				PC ae C36:1					TG(22:4_34:2)				Cer(d16:1/18:0)
Taurine										TG(17:1_36:3)				PC aa C30:0					TG(18:2_36:3)				3-Hydroxyisobutyric acid
N-Acetyl-Methionine										SM C18:0				Leucine					DG(18:2_18:2)				SM C26:0
5-Hydroxyindoleacetic acid										Asymmetric dimethylarginine				CE(18:2)					TG(20:4_36:2)				Caprylic acid
CE(18:0)										TG(17:0_36:3)				Isoleucine					C5:1DC				PC aa C40:2
Threonic acid										HexCer(d18:1/22:0)				TG(18:2_35:1)					LysoPC a C20:3				4-Hydroxybenzoic acid
3-Aminoisobutyric acid										PC ae C38:4				Cer(d18:1/16:0)					CE(14:1)				Hex3Cer(d18:1_22:0)
Cytidine										TG(18:3_36:4)				C16:1					3-Hydroxyisovaleric acid				SM C26:1
DG(16:1_18:1)										TG(20:3_36:3)				TG(18:2_35:2)					PC ae C40:1				TG(18:3_30:0)
DG(18:0_20:0)										CE(22:6)				TG(14:0_35:1)					TG(18:2_34:4)				C10:1
3-Deoxyglucosone										C3OH				SM C24:0					TG(18:0_36:1)				TG(16:0_32:0)
TG(20:3_32:2)										Pyruvic acid				TG(14:0_32:2)					TG(18:1_36:4)				Cer(d18:1/23:0)
Glucose										TG(16:1_36:4)				Alanine					TG(20:1_34:0)				PC aa C40:4
Hex2Cer(d18:1/18:0)										TG(18:3_32:0)				SM C18:1					TG(16:0_36:2)				C7DC
HexCer(d18:2/23:0)										PC ae C38:5				Lysine					TG(18:3_36:2)				TG(16:1_30:1)
Lactic acid										HexCer(d18:1/16:0)				N-Acetyl-Arginine					TG(16:1_34:0)				TG(16:0_32:1)
C5OH										TG(18:0_32:2)				CE(17:1)					TG(16:0_36:5)				3-Indoleacetic acid
										TG(18:2_34:3)				TG(14:0_34:3)					TG(20:5_36:2)				TG(20:4_32:1)
										TG(18:0_36:4)				PC aa C42:0					TG(16:1_34:1)				Maleic acid
										HexCer(d18:1/23:0)				TG(16:0_37:3)					TG(18:3_34:3)				CE(20:3)
										HexCer(d18:1/24:0)				DG(18:1_20:3)					CE(22:5)				N1-Acetyl-Lysine + N6-Acetyl-Lysine
										TG(18:2_36:4)				PC ae C32:2					DG(16:0_18:1)				TG(16:0_33:1)
										TG(16:0_32:2)				Methionine					TG(18:1_34:1)				TG(20:4_34:0)
										HexCer(d18:1/20:0)				TG(20:1_32:1)					2-Hydroxy-2-methylbutyric acid				TG(20:4_32:2)
										Hex2Cer(d18:1/16:0)				CE(18:3)					TG(16:1_36:1)				TG(16:1_32:1)
										Phenylalanine				PC ae C36:3					TG(18:1_36:6)				TG(18:1_35:2)
										SM(OH) C14:1				PC ae C38:1					TG(14:0_36:2)				Cer(d18:0/22:0)
										TG(16:0_40:8)				PC ae C36:2					TG(20:1_34:1)
										PC aa C36:3				TG(16:0_33:2)					2-Hydroxyisovaleric acid
										TG(18:0_34:2)				TG(18:3_36:1)					TG(16:0_34:0)
										C12				Hex2Cer(d18:1/24:0)					TG(18:2_38:6)
										C5				PC ae C36:0					3-Methoxytyramine
										LysoPC a C24:0				Tyramine					TG(16:0_40:7)
										PC ae C38:6				Guanosine					HexCer(d18:2/24:0)
										PC aa C34:3				TG(16:1_34:3)					TG(20:4_34:1)
										TG(20:2_34:1)				TG(16:1_38:3)					Proline
										N-Acetyl-Serine				Glycine					Nicotinamide ribotide
										Tryptophan				Putrescine					DG(16:1_20:0)
										Cystathionine				PC aa C34:4					TG(14:0_36:1)
										PC aa C36:1				PC aa C36:2					Homoarginine
										TG(18:2_32:2)				Deoxyguanosine					TG(16:0_38:6)
										Thymidine				Succinic acid					Cer(d18:1/24:0)
										Cer(d18:1/22:0)				p-Hydroxyhippuric acid					C18
										C10				Asparagine					PC aa C36:6
										PC ae C40:5				Ornithine					TG(20:3_34:0)
										C3:1				Histidine					TG(16:0_34:3)
										TG(22:5_34:2)				Aspartic acid					LysoPC a C28:1
										PC ae C40:6									TG(18:3_34:0)
										CE(16:1)									C2
										Argininic acid									Tartaric acid
										C4									Guanidoacetic acid
										PC ae C42:3									Hypoxanthine
										TG(18:1_38:7)									Hex3Cer(d18:1/18:0)
										PC ae C36:4									PC ae C38:0
																			PC ae C40:4
																			TG(18:0_34:3)
																			C5MDC
																			PC aa C38:1
																			Kynurenine
																			4-Hydroxyphenylpyruvic acid
																			Methylhistidine
																			3,4-Dihydroxybutyric acid
																			alpha-Ketoisovaleric acid
																			PC ae C30:2
																			2-oxoisocaproic acid
																			N-Acetyl-Alanine
																			PC aa C42:6
																			DG(18:1_18:1)
																			TG(16:0_38:2)
																			TG(18:2_32:0)
																			Picolinic acid
																			TG(16:1_36:2)
																			PC ae C42:5
																			TG(18:2_33:2)
																			Deoxyinosine
																			TG(18:0_36:3)
																			Deoxyuridine
																			TG(20:1_26:1)
																			Hex2Cer(d18:1/24:1)
																			TG(16:0_34:4)
																			TG(16:0_38:5)
																			TG(18:0_32:0)
																			Methionine sulfoxide
																			3-Hydroxybutyric acid
																			C3
																			TG(18:0_36:2)
																			TG(18:1_34:4)
																			TG(16:0_36:4)
																			Inosine
																			HexCer(d18:2/16:0)
																			TG(14:0_36:4)
																			TG(22:6_34:2)
																			PC aa C38:4
																			TG(18:3_34:1)
																			TG(18:2_34:2)
																			PC ae C36:5
																			PC aa C40:5
																			TG(14:0_34:1)
																			Carnosine
																			TG(16:0_38:1)
																			PC ae C44:3
																			TG(20:1_24:3)
																			Hex2Cer(d18:1/14:0)
																			LysoPC a C28:0
																			TG(18:0_36:5)
																			DG(17:0_17:1)
																			PC aa C40:6
																			DG(18:1_20:4)
																			DG(16:0_16:1)
																			TG(14:0_36:3)
																			TG(20:4_36:4)
																			Hex2Cer(d18:1/22:0)
																			TG(16:0_28:2)
																			PC ae C34:3
																			DG(14:0_20:0)
																			PC ae C30:1
																			PC ae C44:6
																			Indole-3-propionic acid
																			TG(16:0_36:3)
																			TG(16:1_34:2)
																			LysoPC a C26:0
																			2-hydroxyglutaric acid
																			PC aa C38:3
																			TG(20:4_34:3)
																			TG(18:1_36:1)
																			TG(14:0_34:2)
																			TG(17:1_34:3)
																			DG(16:0_20:0)
																			TG(18:1_36:2)
																			N2-Acetyl-Ornithine
																			Ethanolamine
																			TG(18:2_36:1)
																			trans-4-Hydroxyproline
																			DG(16:0_18:2)
																			C10:2
																			TG(18:1_30:0)
																			DG(18:1_22:6)
																			4-Hydroxyphenylacetic acid
																			C14:2
																			5-Methyluridine
																			HexCer(d16:1/22:0)
																			Serine
																			TG(20:0_34:1)
																			TG(20:2_34:2)
																			TG(18:2_36:2)
																			CE(17:0)
																			TG(17:1_32:1)
																			PC ae C34:0

## Sheet: Table S4B
Table S4B: Pathway analysis of common metabolites across serum, jejunal contents, and feces in ne-affected birds
	Total	Hits	Impact	Raw p
Citrate cycle (TCA cycle)	20	2	0.14041	0.0059582
Glyoxylate and dicarboxylate metabolism	32	2	0.05556	0.014971
Arginine and proline metabolism	36	2	0.02442	0.018774
Butanoate metabolism	15	1	0	0.088234
Histidine metabolism	16	1	0.18852	0.093862
beta-Alanine metabolism	21	1	0.05597	0.12154
Propanoate metabolism	22	1	0	0.12699
Alanine, aspartate and glutamate metabolism	28	1	0	0.15903
Glutathione metabolism	28	1	0	0.15903
Cysteine and methionine metabolism	33	1	0.04179	0.18493
Glycine, serine and threonine metabolism	34	1	0	0.19003
Biosynthesis of unsaturated fatty acids	36	1	0	0.20013
Fatty acid elongation	39	1	0	0.21508
Fatty acid degradation	39	1	0	0.21508
Fatty acid biosynthesis	47	1	0.01473	0.25372
